# Supplementary material for: Organic Honey from the Middle Atlas of Morocco: Physicochemical Parameters, Antioxidant Properties, Pollen Spectra, and Sugar Profiles
Source: MDPI journal article supplement (doi:10.3390/foods11213362), 2022-10-26

# Chromatogram

Sample Name : thym sem4119  
 File Name : C:\GC\Data\ROUTINE\sem4119\sem4119.raw  
 Date : 12/18/2019 12:18:38 PM  
 Method :  
 Start Time : 0.00 min  
 End Time : 54.19 min  
 Time of Injection : 10/8/2019 1:36:10 AM  
 Low Point : 0.00 mV  
 High Point : 400.00 mV  
 Plot Offset : 0.00 mV  
 Plot Scale : 400.0 mV

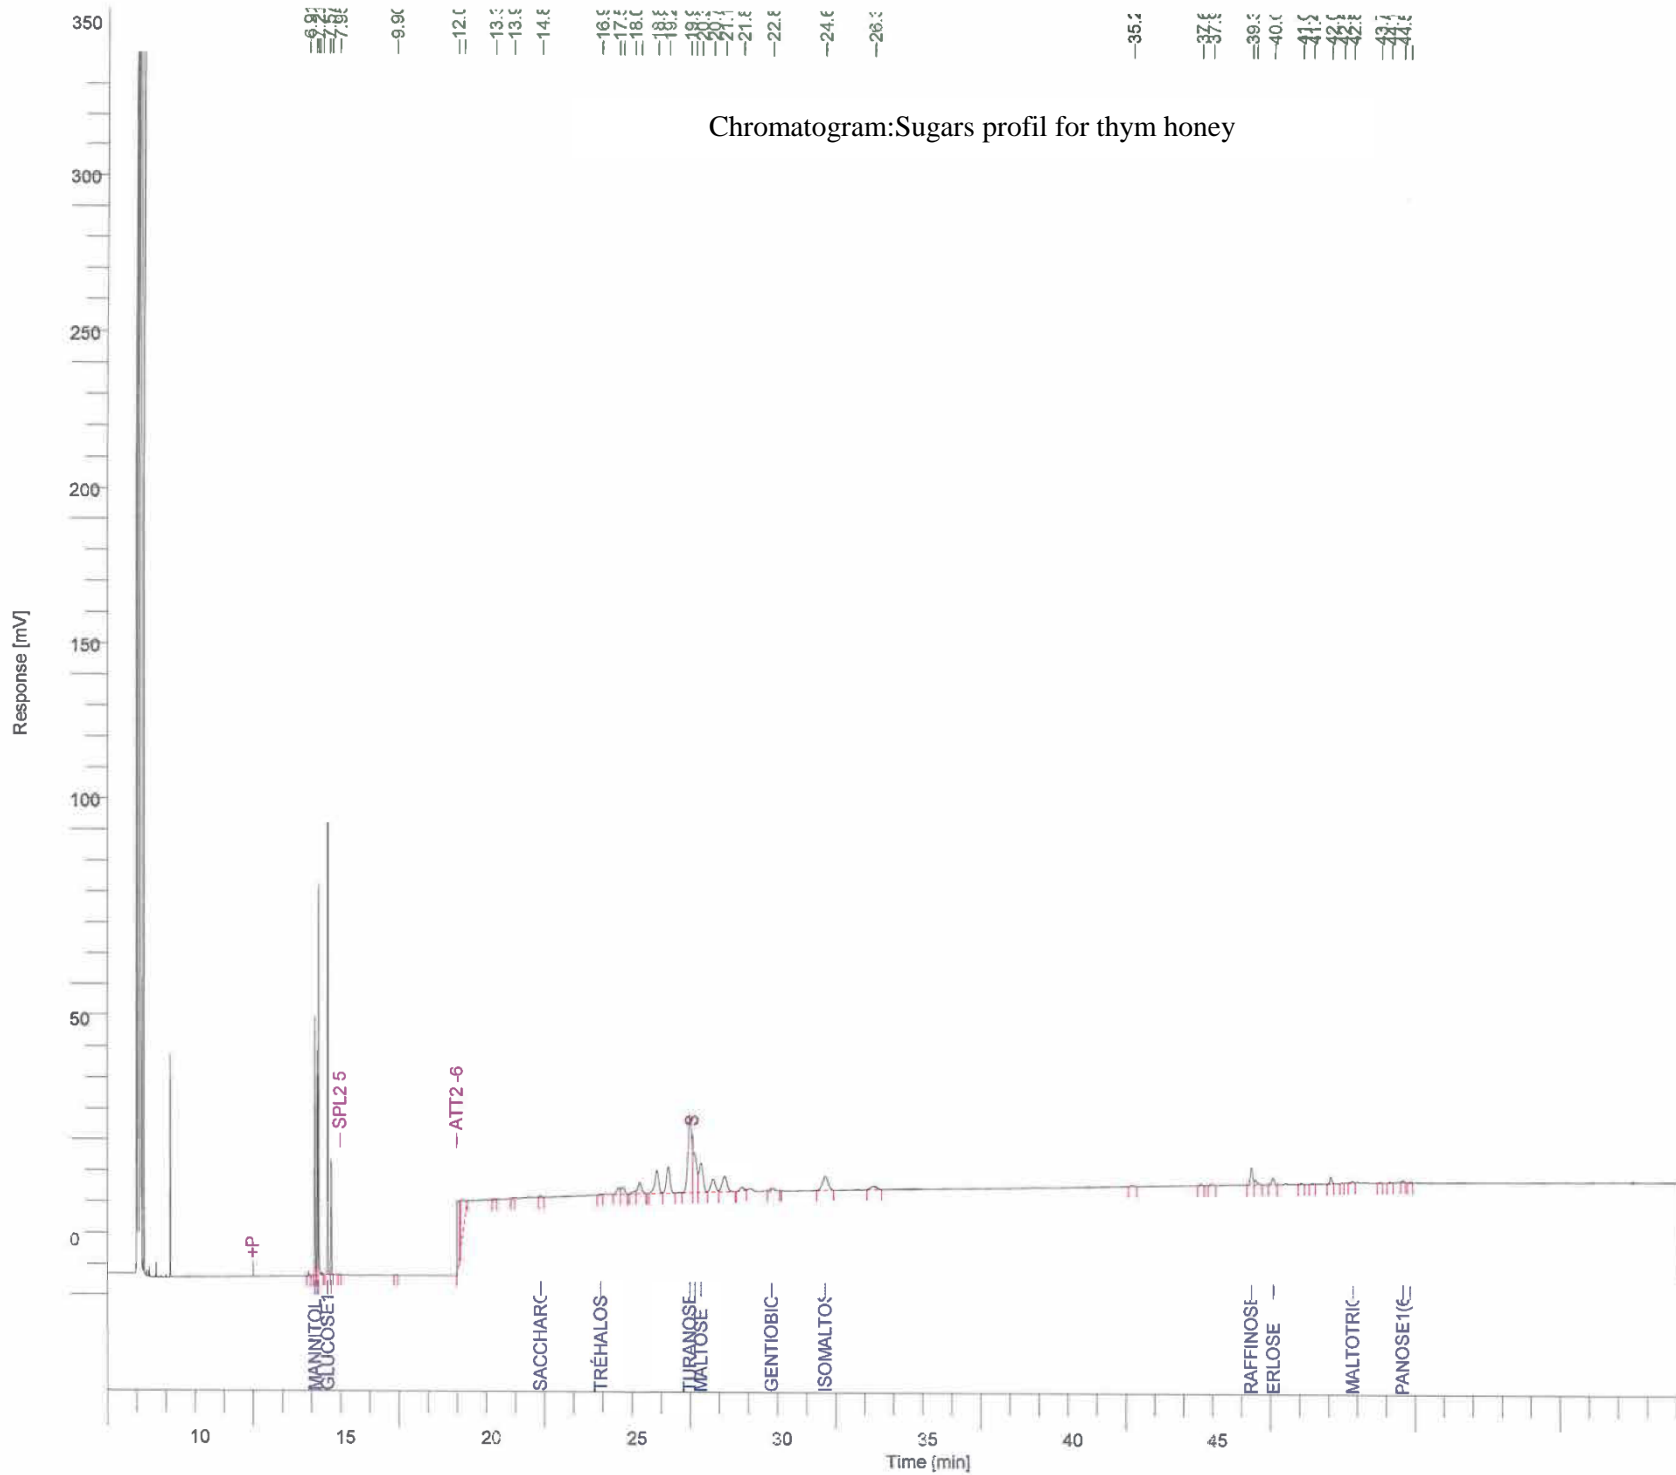

# Chromatogram

Sample Name : buple rum sem4119  
 007 File Name : C:\GC\Data\ROUTINE\sem4119\24667  
 sem4119.raw Date : 12/18/2019 12:17:54 PM  
 Method :  
 Start Time : 0.00 min End Time : 54.19 min Time of Injection: 10/7/2019 10:23:48 PM  
 Plot Offset: 0.00 mV Plot Scale: 400.0 mV Low Point : 0.00 mV High Point : 400.00 mV

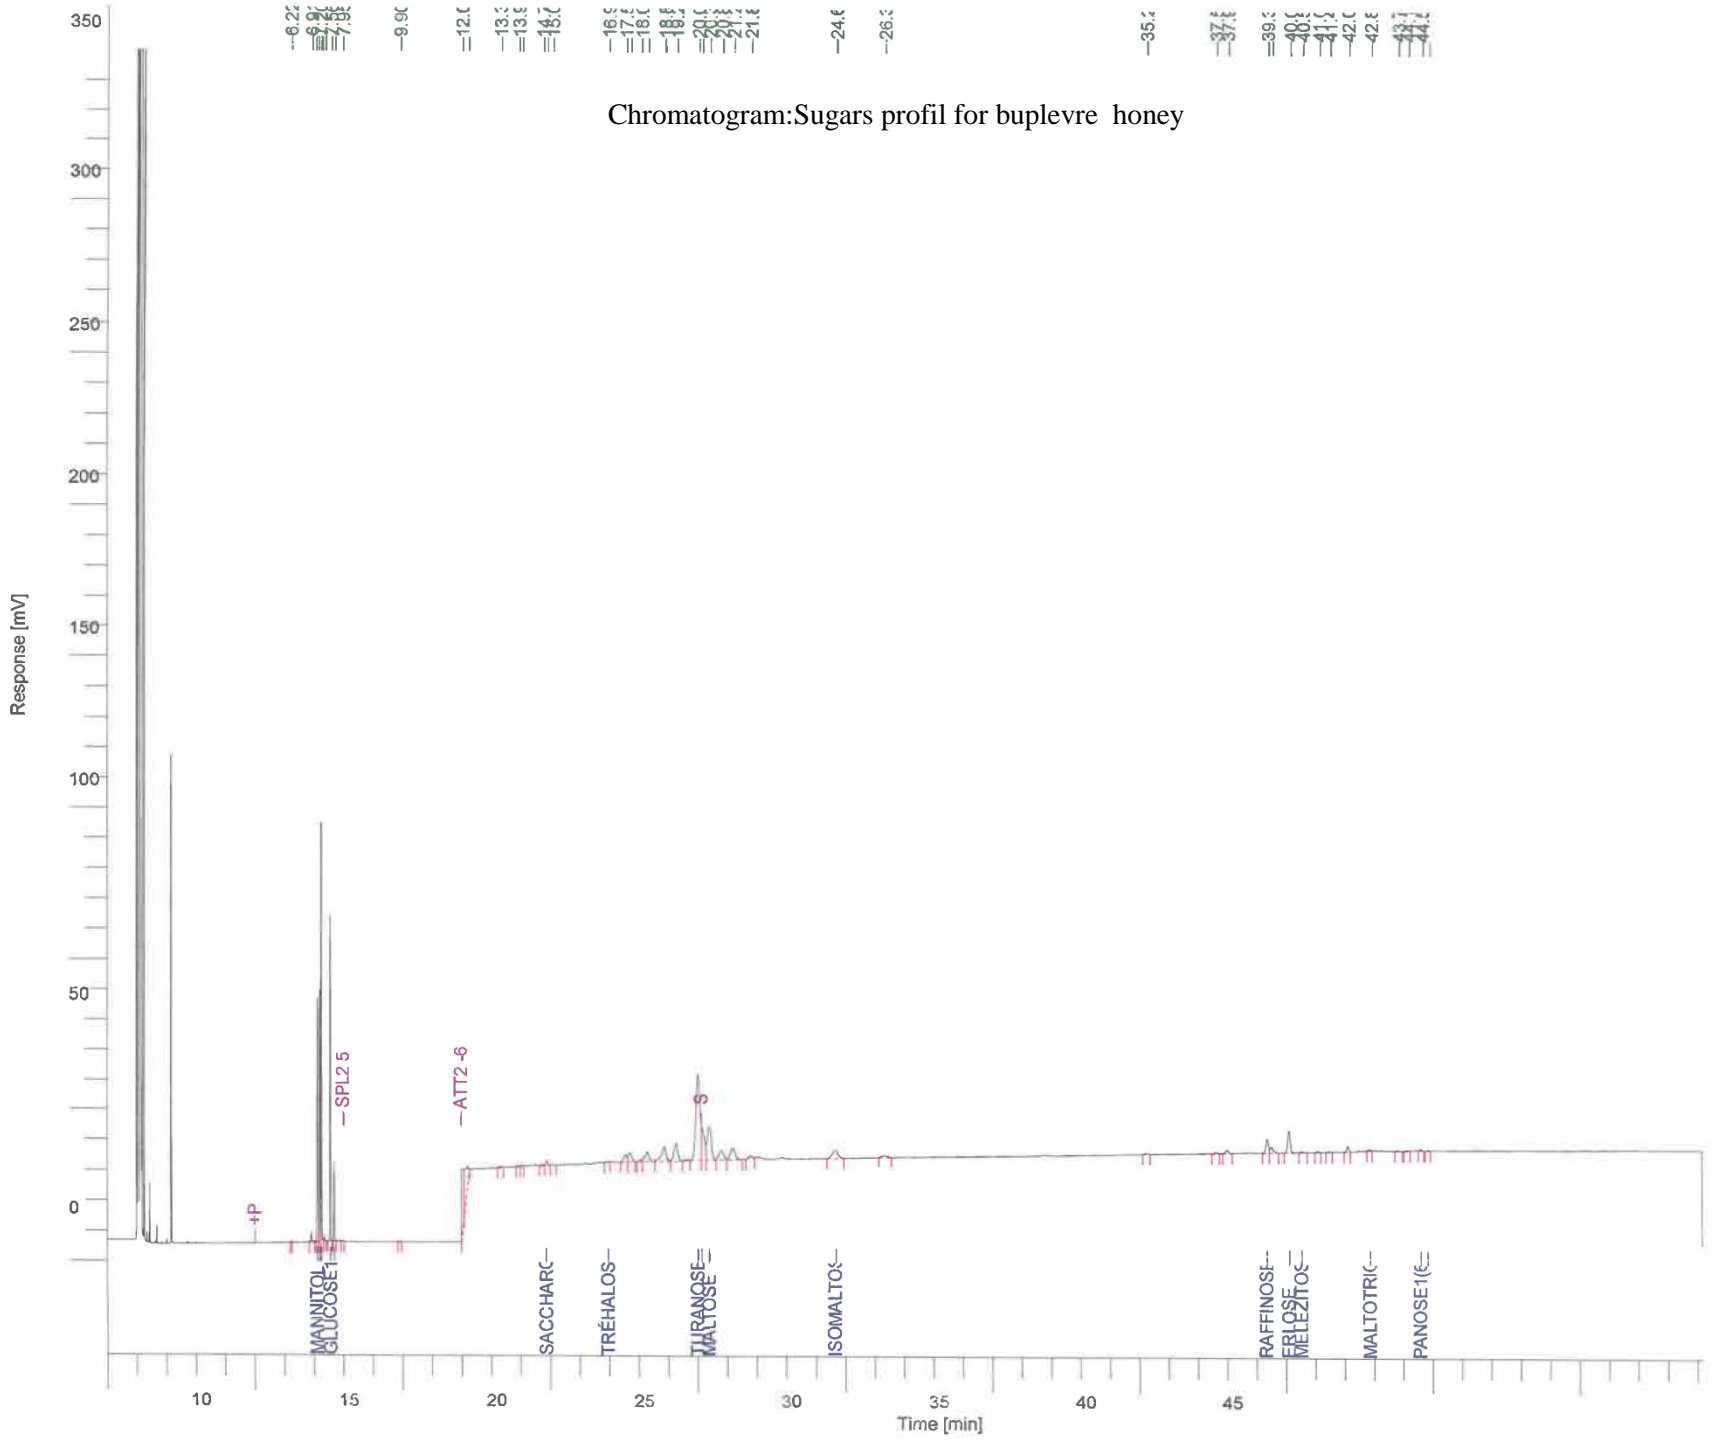

# Chromatogram

Sample Name : jujubier sem4519 Sample #: 013 File Name : C:\GC\Data\ROUTINE\sem4519\24674 sem4519.raw Date : 12/18/2019 12:23:10 PM Time of Injection: 11/5/2019 3:53:27 AM High Point : 400.00 mV  
 Method : Start Time : 0.00 min End Time : 54.19 min Low Point : 0.00 mV  
 Plot Offset: 0.00 mV Plot Scale: 400.0 mV

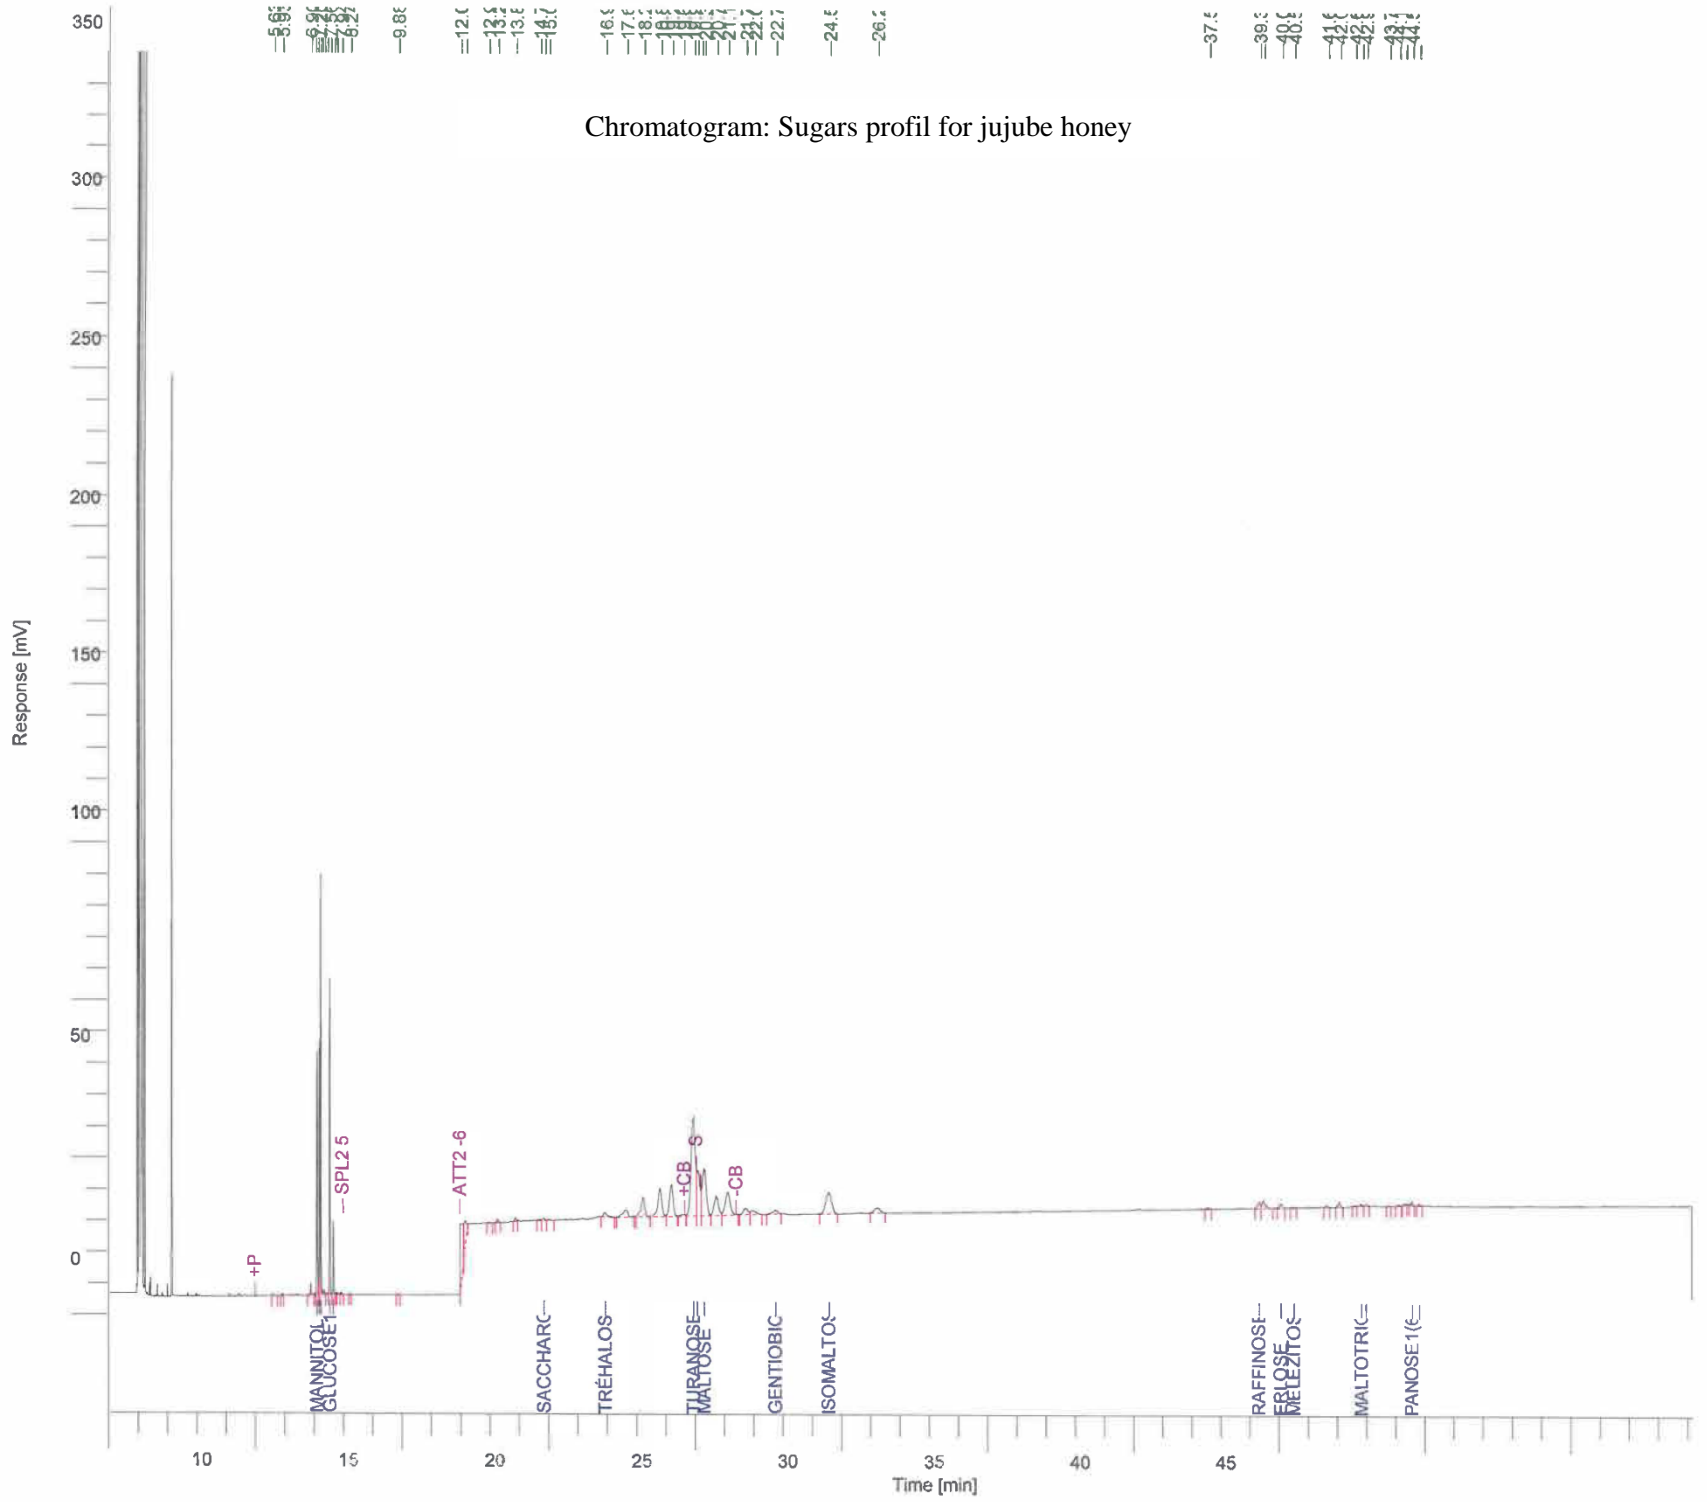

# Chromatogram

Sample Name : polyfloral sem4119  
 011 File Name : C:\GC\Data\ROUTINE\sem4119\24671  
 sem4119.raw Date : 12/18/2019 12:26:04 PM  
 Method : Time of Injection: 10/8/2019 2:40:21 AM  
 Start Time : 0.00 min End Time : 54.19 min Low Point : 0.00 mV High Point : 400.00 mV  
 Plot Offset : 0.00 mV Plot Scale: 400.0 mV

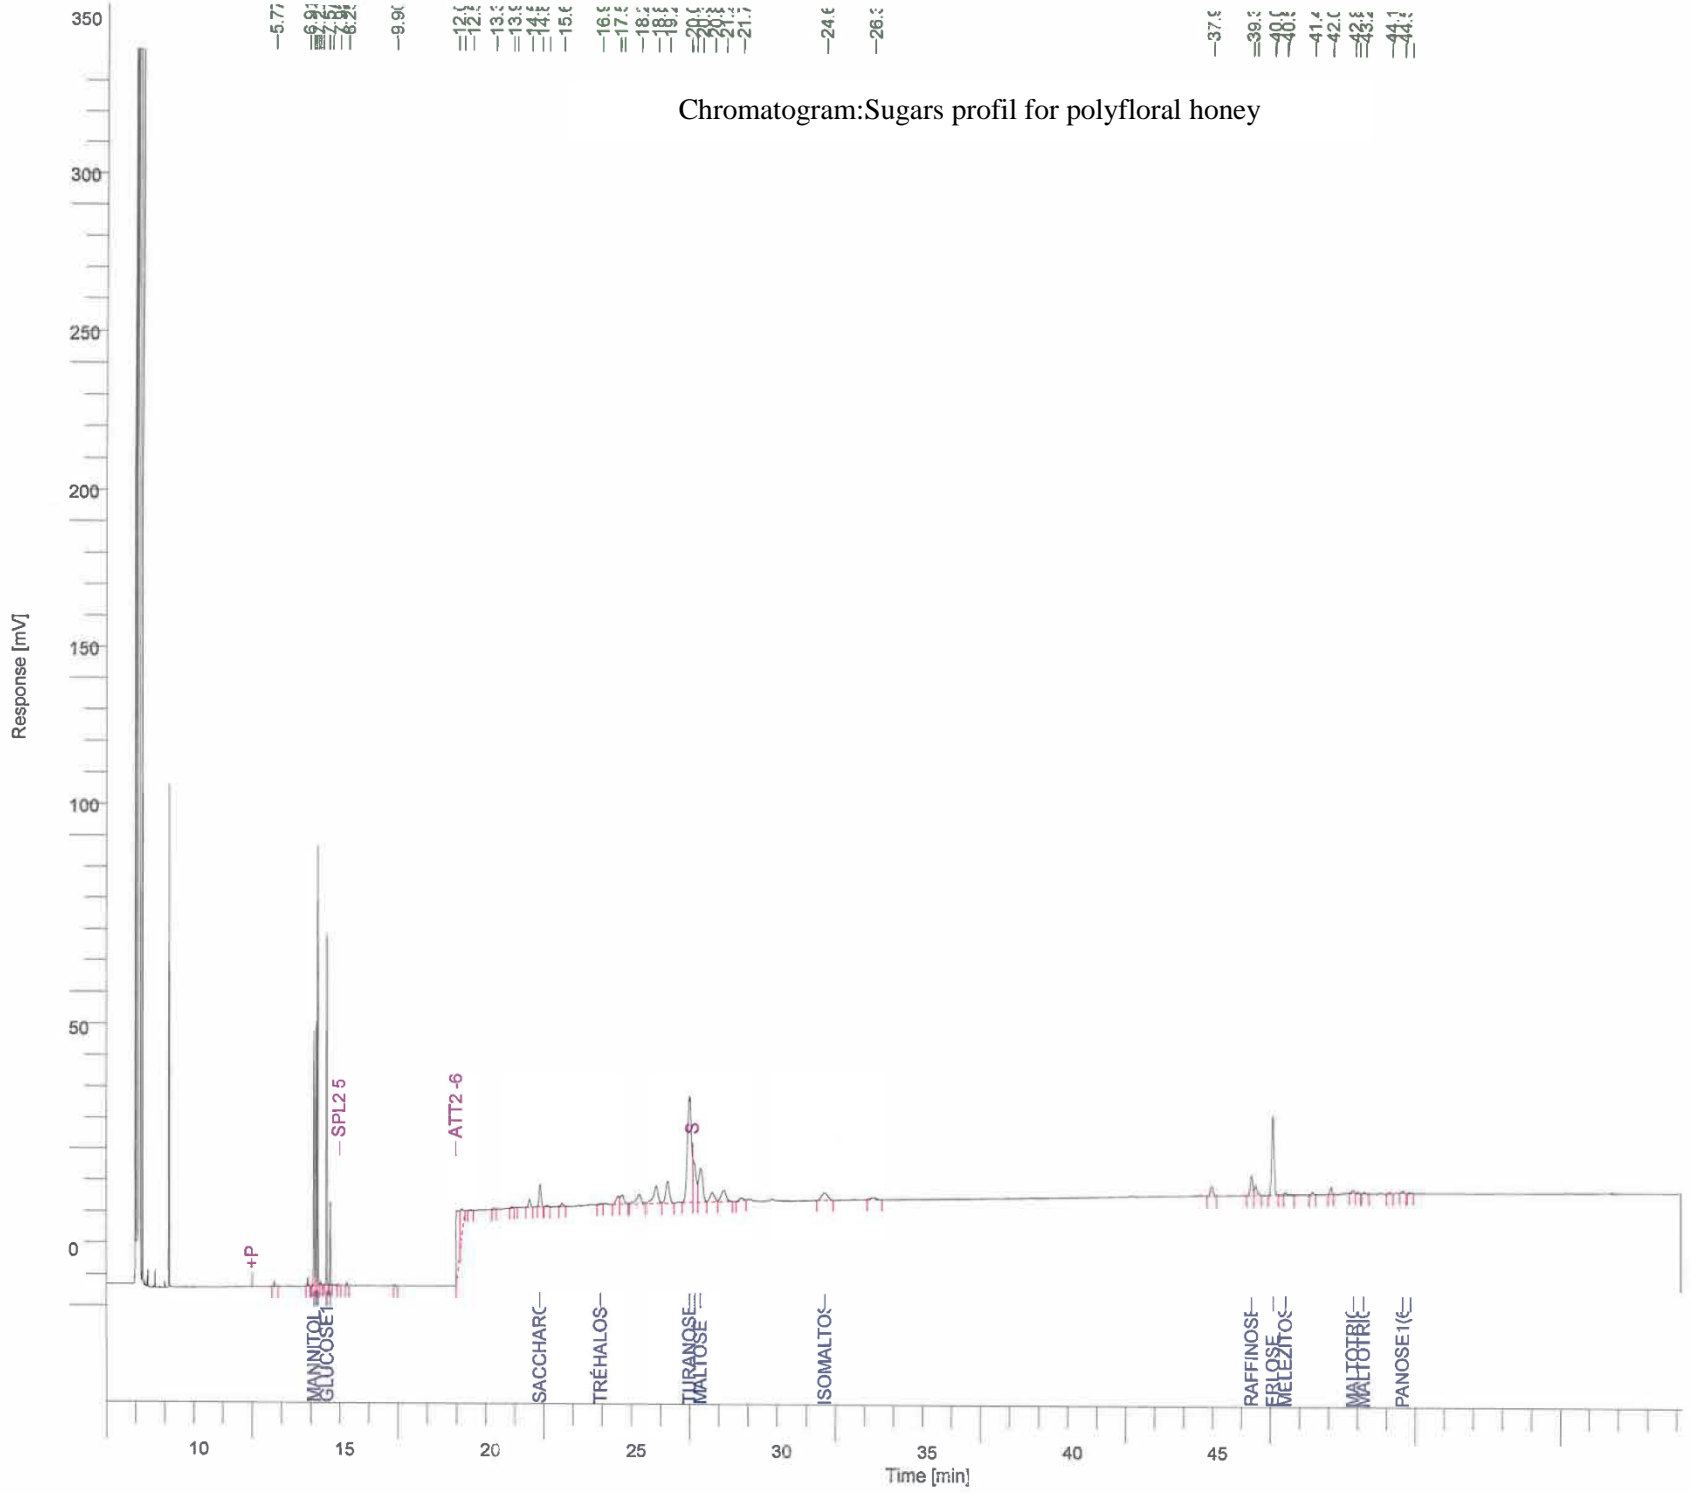

Supplement: s1 [file s1]
